# Supplementary material for: Discovery of new targets of phenolic acids in danshen using a label-free cell phenotypic assay
Source: Royal Society of Chemistry journal article supplement (doi:10.1039/c4ra16102e), 2015-01-01

**Discovery of new targets of phenolic acids in Danshen using label-free cell phenotypic assay**

Jixia Wang <sup>a</sup>, Tao Hou <sup>b</sup>, Lai Wei <sup>a</sup>, Liying Shi <sup>b</sup>, Jian He <sup>a</sup>, Nan Zhou <sup>d</sup>, Guangwei Sun <sup>a</sup>, Xiuli Zhang <sup>\*a,c</sup>  
and Xinmiao Liang <sup>a</sup>

<sup>a</sup> Key Lab of Separation Science for Analytical Chemistry, Dalian Institute of Chemical Physics, Chinese Academy of Sciences, Dalian, China

<sup>b</sup> Institute of Materia Medica, Dalian University, Dalian, China

<sup>c</sup> Co-innovation Center of Neuroregeneration, Nantong University, Nantong, 226019, China

<sup>d</sup> Department of Oral Pathology, College of Stomatology, Dalian Medical University, Dalian, China

\*Corresponding authors: Xiuli Zhang

Tel.: +86 411 84379519; fax: +86 411 84379539.

E-mail addresses: [zhangxiuli@dicp.ac.cn](mailto:zhangxiuli@dicp.ac.cn)

## SUMMARY

This supporting information file includes additional information and results as described in the article.

**Fig. S1** The expression level of GPR35 in HT-29 and A431 cells. (a) Western blot assay of GPR35 protein in HT-29 and A431 cells. (b) DMR response of the known agonist zaprinast (10  $\mu$ M) in HT-29 and A431 cells.

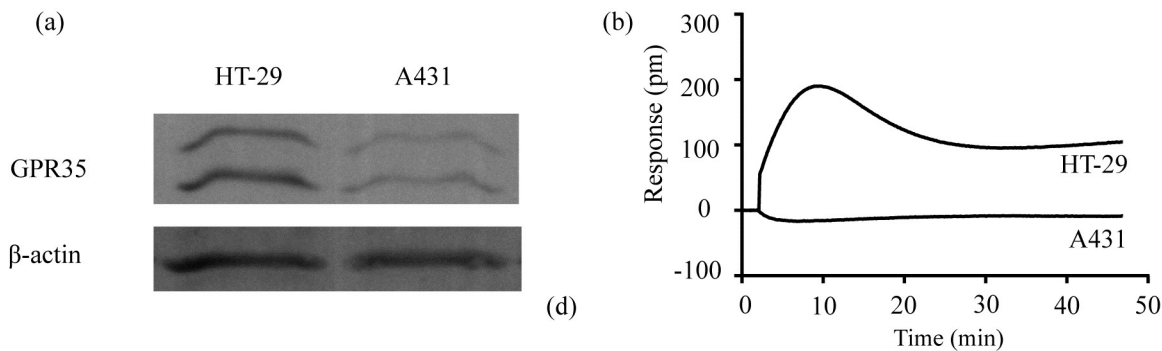

**Fig. S2** The DMR amplitudes of compounds as a function of ML145 doses in HT-29 cells after pre-treated with ML145 for 10 min. (a) Lithospermic acid, salvianolic acid B and danshensu at their  $EC_{80}$  of 125  $\mu$ M, 100  $\mu$ M and 100  $\mu$ M, respectively; (b) salvianolic acid A and salvianolic acid C at their  $EC_{80}$  of 125  $\mu$ M and 100  $\mu$ M, respectively; (c) salvianolic acid A and salvianolic acid C at their  $EC_{50}$  of 35  $\mu$ M and 20  $\mu$ M, respectively; (d) salvianolic acid A and salvianolic acid C at their  $EC_{20}$  of 15  $\mu$ M and 4  $\mu$ M, respectively. All data represents mean  $\pm$  s.d. from 2 independent measurements, each in duplicate ( $n = 4$ ).

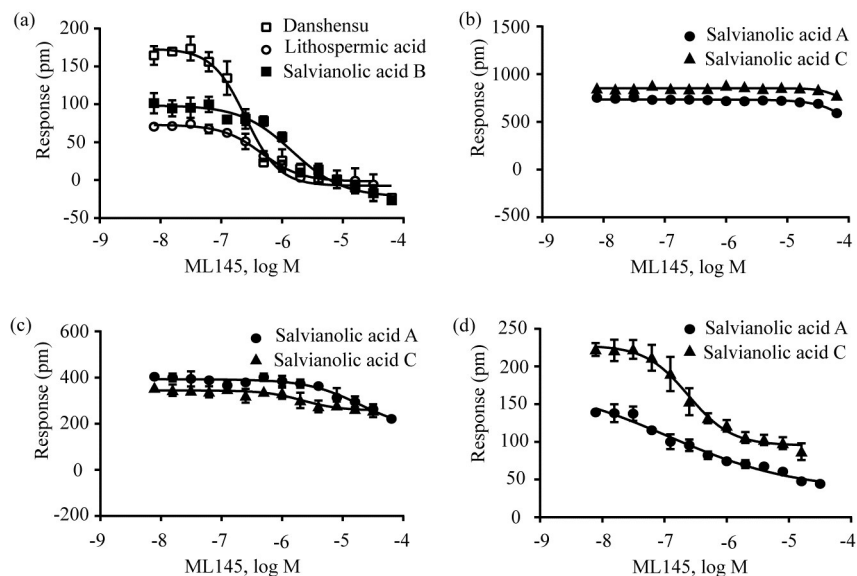

Supplement: c4ra16102e1.pdf [file c4ra16102e1.pdf]
